# Supplementary figures and images for: Analysis of nucleoside-binding proteins by ligand-specific elution from dye resin: application to Mycobacterium tuberculosis aldehyde dehydrogenases
Source: PubMed Central journal article supplement — J Struct Funct Genomics. 2009 Nov 13;10(4):291–301. doi: 10.1007/s10969-009-9073-z (PMC2780684; doi:10.1007/s10969-009-9073-z), 2009-11-13

**Supplementary Figure 1. Analysis of nucleotides in preparations of recombinant Rv0223c protein.**

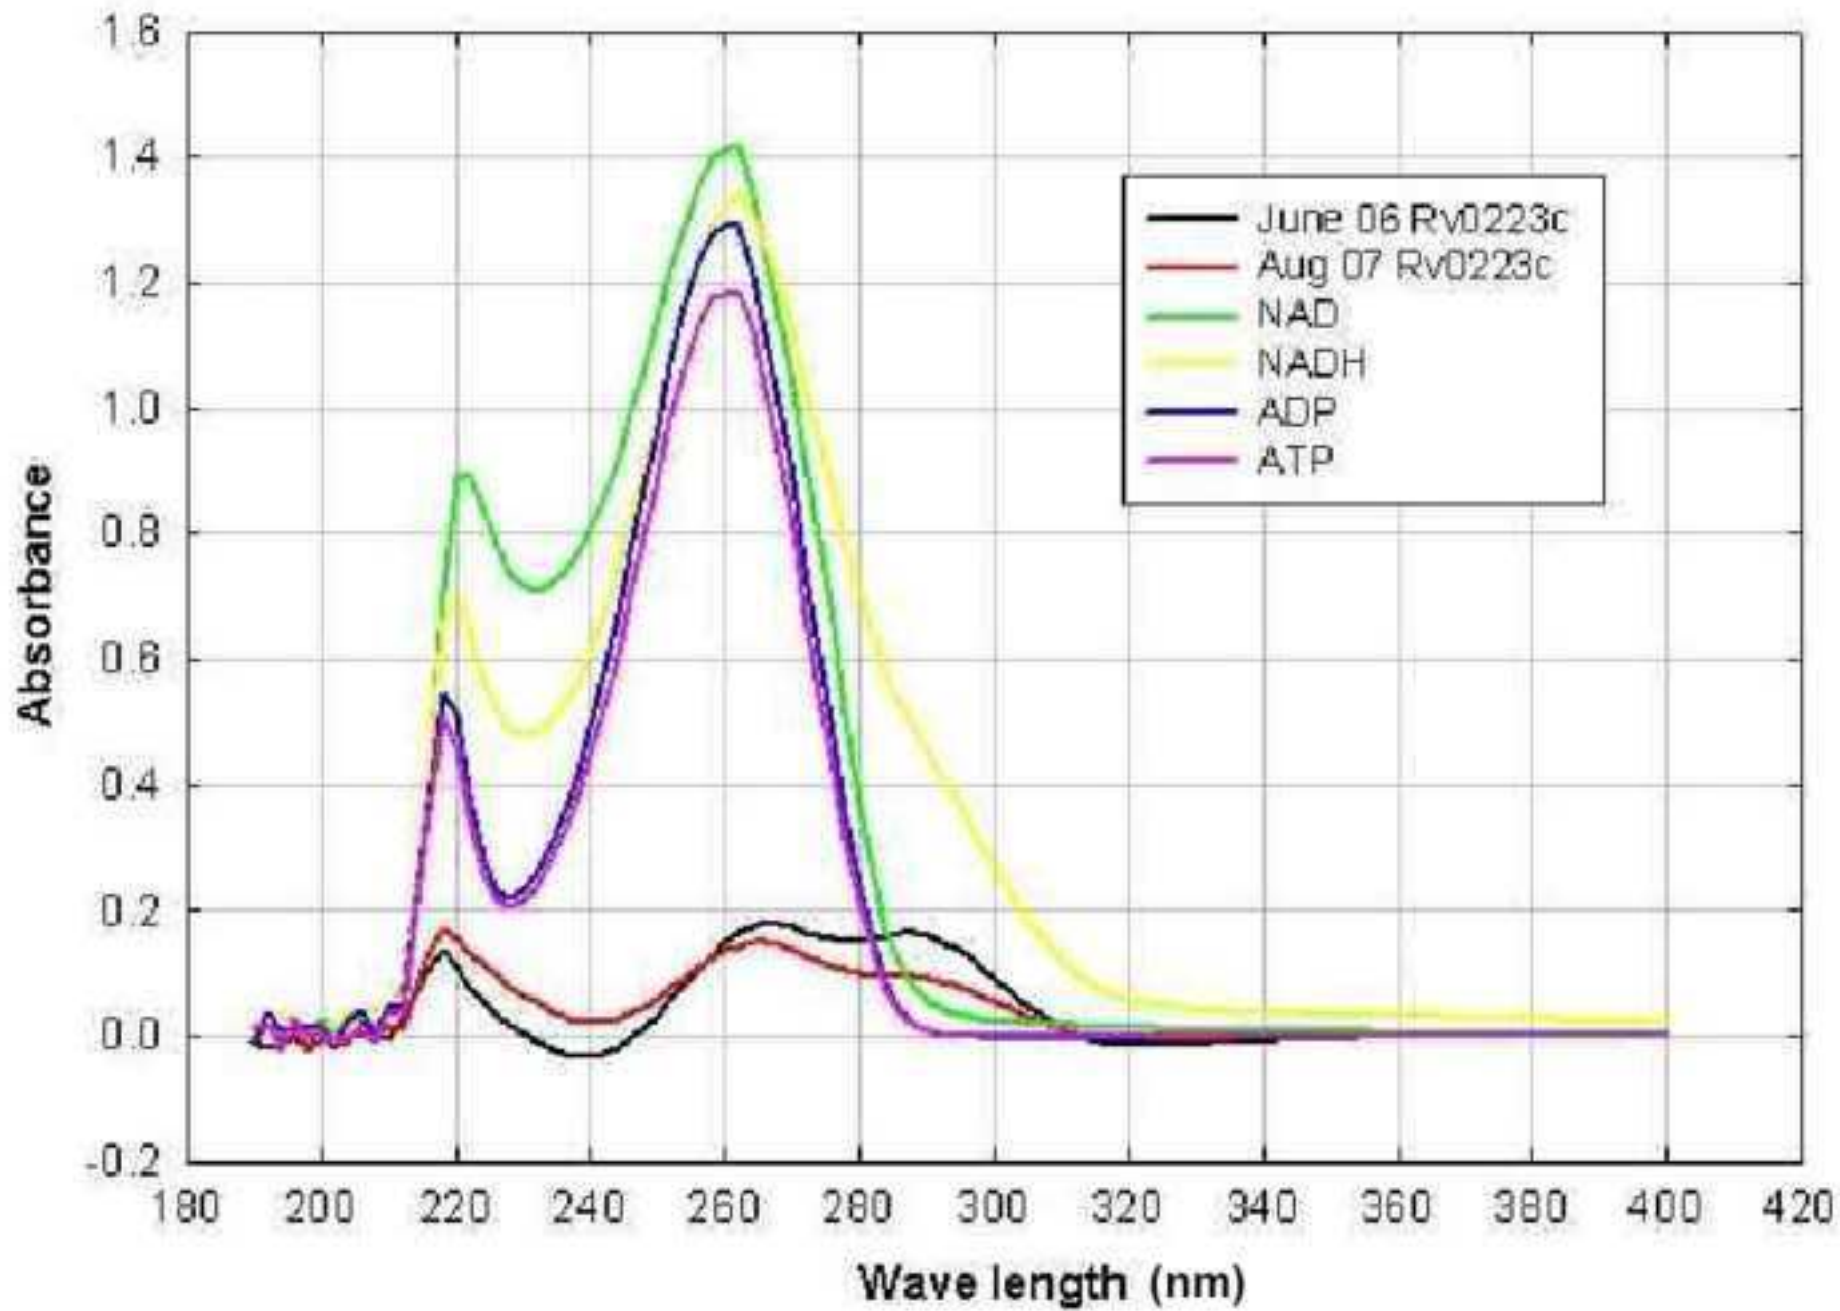

Supplement: 10969_2009_9073_MOESM2_ESM.pdf [file 10969_2009_9073_MOESM2_ESM.pdf]
